# Supplementary material
Source: PubMed Central journal article supplement (PMC6439658)

## Supplementary Online Content

Kohler A, Lavanchy JL, Lenoir U, Kurmann A, Candinas D, Beldi G. Effectiveness of prophylactic intraperitoneal mesh implantation for prevention of incisional hernia in patients undergoing open abdominal surgery: a randomized clinical trial. *JAMA Surg*. Published online November 21, 2018. doi:10.1001/jamasurg.2018.4221

**eFigure.** Range of Motion for Trunk Extension/Flexion

This supplementary material has been provided by the authors to give readers additional information about their work.

**eFigure 1. Range of Motion for Trunk Extension/Flexion**

(A) Elongation of the umbilicus-xiphoid distance in maximal retroflexion compared to upright position before and at various time points after surgery.

(B) Finger-to-floor distance in maximal trunk flexion for the same time points. Data are presented as mean  $\pm$  SEM, statistical significance was determined by students t-test.

**A Elongation of umbilicus-xiphoid distance in reclination**

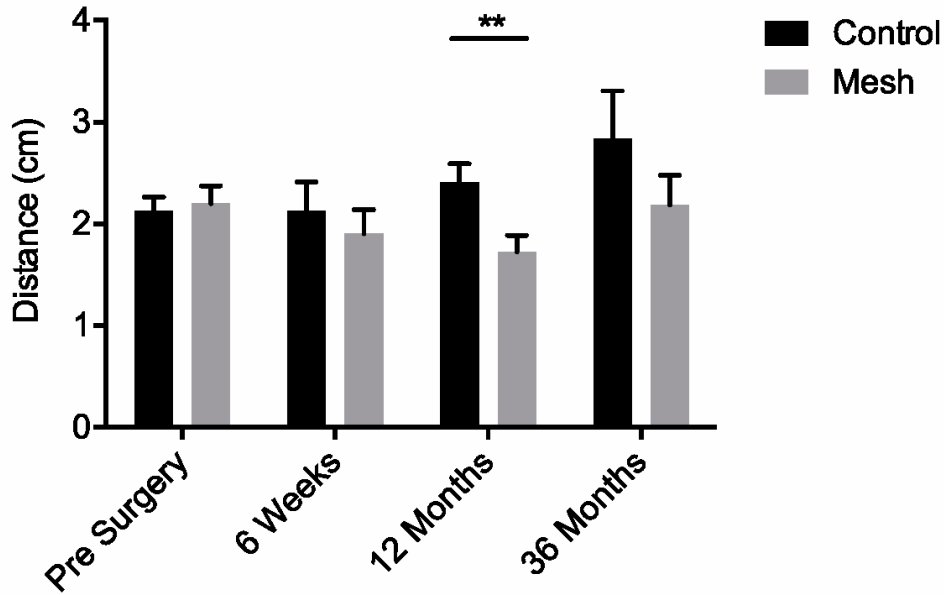

**B Finger-to-floor distance**

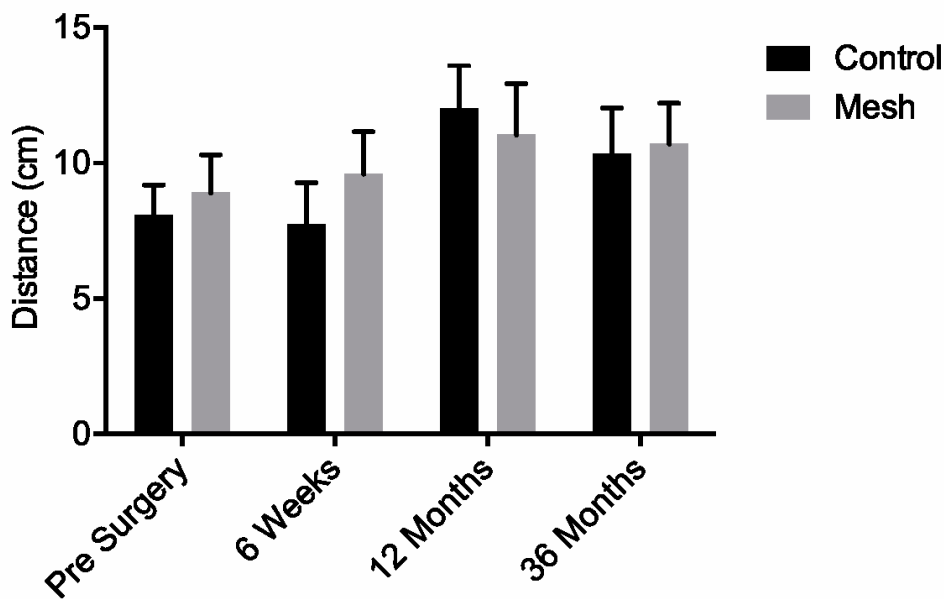

Supplement: jamasurg-154-109-s002.pdf [file jamasurg-154-109-s002.pdf]
